# Supplementary material
Source: MDPI journal article supplement (https://www.mdpi.com/2073-4344/9/8/689)
Supplement: s1 [file s1]

Supplementary Materials

# The Effects of Catalyst Support and Temperature on the Hydrotreating of Waste Cooking Oil (WCO) over CoMo Sulfided Catalysts

Hui Wang <sup>1,2,\*</sup>, Kyle Rogers <sup>2</sup>, Haiping Zhang <sup>2,3</sup>, Guoliang Li <sup>2</sup>, Jianglong Pu <sup>1</sup>, Haoxuan Zheng <sup>2</sup>, Hongfei Lin <sup>2</sup>, Ying Zheng <sup>2,4,\*</sup> and Siau Ng <sup>5</sup>

<sup>1</sup> College of Biological, Chemical Sciences and Engineering, Jiaxing University, 118 Jiahang Road, Jiaxing 314001, China

<sup>2</sup> Department of Chemical Engineering, University of New Brunswick, 15 Dineen Drive, Fredericton, NB E3B 5A3, Canada

<sup>3</sup> Department of Chemical Engineering & Technology, Tianjin University, Tianjin 300072, China

<sup>4</sup> Department of Chemical and Biochemical Engineering, Western University, 1151 Richmond Street, London, ON N6A 3K7, Canada

<sup>5</sup> National Centre for Upgrading Technology, Canmet ENERGY-Devon, 1 Oil Patch Drive, Edmonton, AB T9G 1A8, Canada

\* Correspondence: huiwang@zjxu.edu.cn or hui.wang@unb.ca (H.W.); ying.zheng@uwo.ca (Y.Z.)

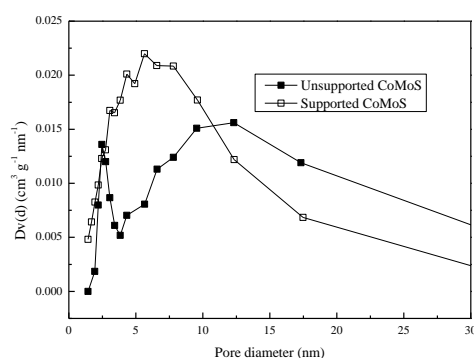

**Figure S1.** BJH pore size distribution of the supported and unsupported catalyst

**Table S1.** The amount of active sites on the supported and unsupported catalyst <sup>[a]</sup>

| Catalysts   | H <sub>2</sub> consumption |                         | H <sub>2</sub> S production |                         |
|-------------|----------------------------|-------------------------|-----------------------------|-------------------------|
|             | Temperature                | Amount                  | Temperature                 | Amount                  |
|             | (°C)                       | (mmol g <sup>-1</sup> ) | (°C)                        | (mmol g <sup>-1</sup> ) |
| Supported   | 175-275                    | 0.55                    | 175-610                     | 0.13                    |
| Unsupported | 230-430                    | 2.56                    | 402-510                     | 1.26                    |

<sup>[a]</sup> Calculation based on the first peak
